# Supplementary material for: Low-Strain KVPO4F@C as Hyperstable Anode for Potassium-Ion Batteries
Source: MDPI journal article supplement (doi:10.3390/met13061038), 2023-05-29
Supplement: s1 [file s1]

## **Supplementary Information**

**Low-Strain KVPO<sub>4</sub>F@C as Hyperstable Anode for Potassium Ion Batteries**

Figure S1

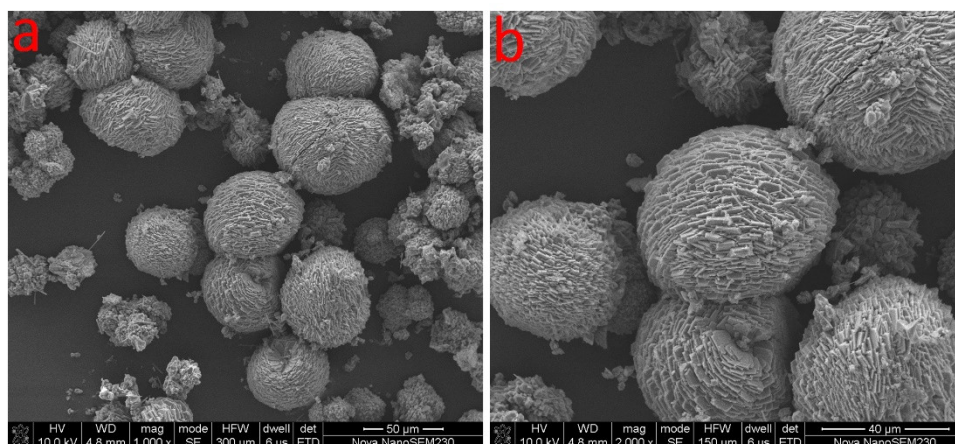

Figure S1. (a) and (b) the SEM images of KVPO<sub>4</sub>F@C showing the reunion behavior of primary particles.

Figure S2

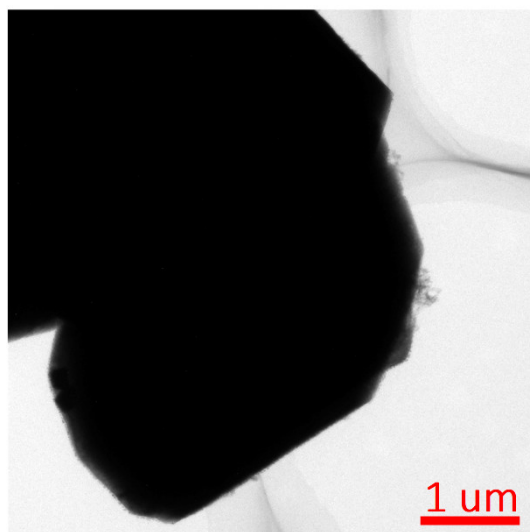Figure S2. TEM images of bare KVPO<sub>4</sub>F@C sample.

Figure S3

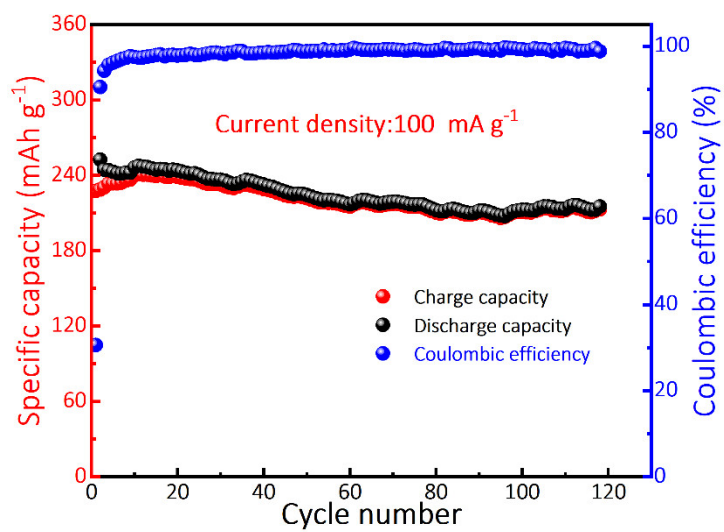Figure S3. Cycle performance of bare KVPO<sub>4</sub>F@C at 100 mA g<sup>-1</sup> for 120 times.

Figure S4

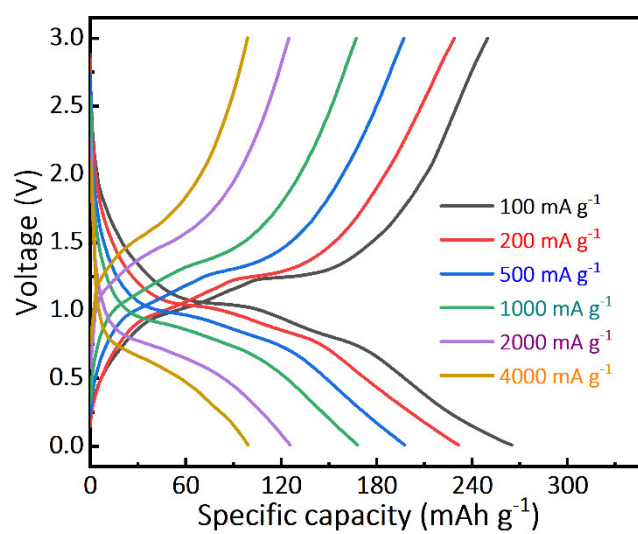

Figure S4. Selected charge/discharge curves at the current densities of 100, 200, 500, 1000, 2000 and 4000  $\text{mA g}^{-1}$ .

Figure S5

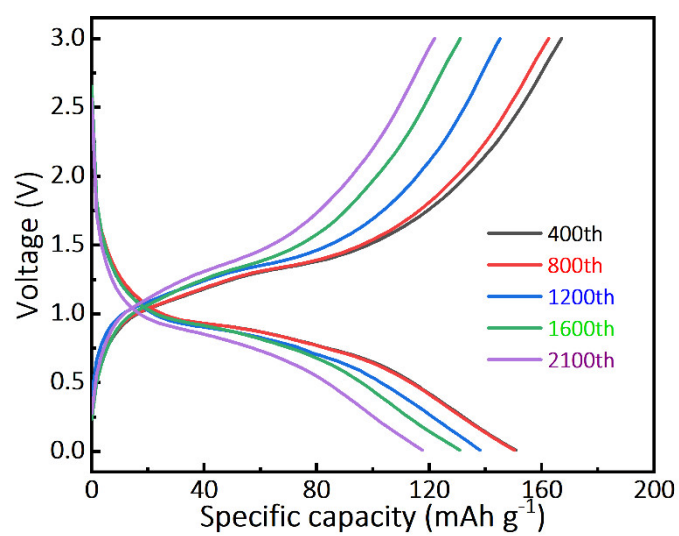

Figure S5. Selected 400th, 800th, 1200th, 1600th, and 2100th charge/discharge curves at the current density of 1000 mA g<sup>-1</sup>.

Figure S6

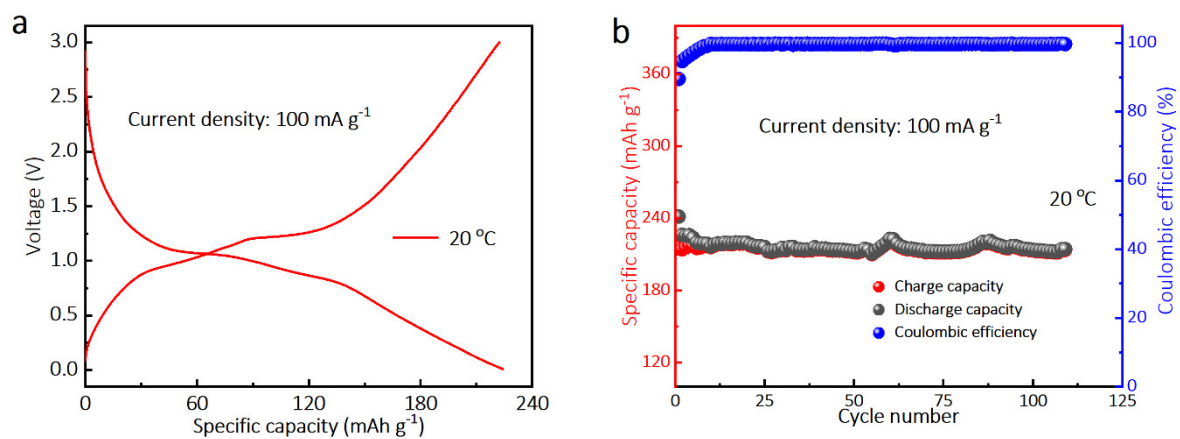

Figure S6. (a) Selected charge/discharge curves at the current densities of 100 mA g<sup>-1</sup> and (b) the cycle performance of KVPO<sub>4</sub>F@C at 100 mA g<sup>-1</sup> for 110 times.

Figure S7

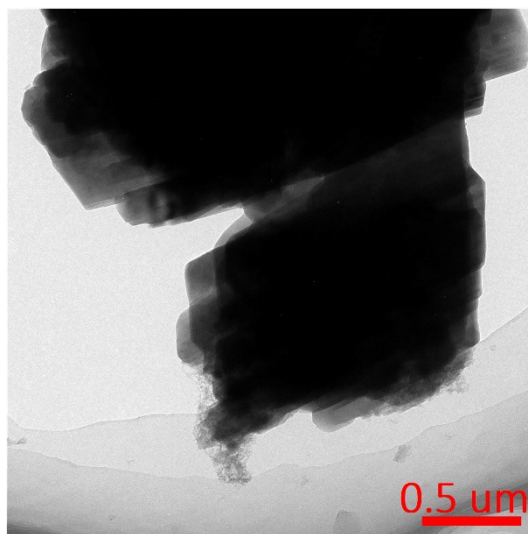

Figure S7 TEM images of KVPO<sub>4</sub>F@C anode after cycling for 100 times.



Figure S8

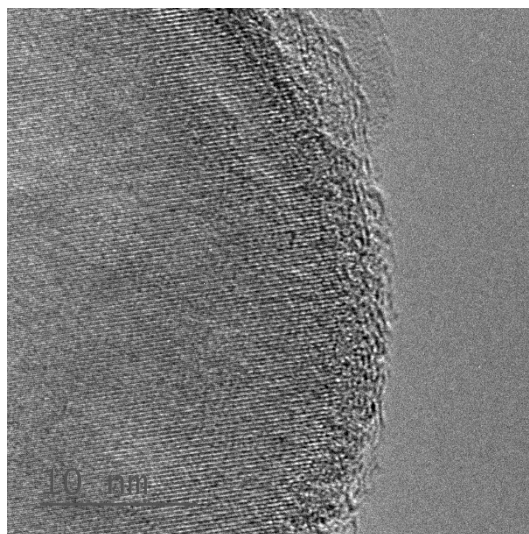

Figure S8 HRTEM images of KVPO<sub>4</sub>F@C anode after cycling for 100 times.
