# Supplementary material for: Low-Strain KVPO4F@C as Hyperstable Anode for Potassium-Ion Batteries
Source: MDPI journal article supplement (doi:10.3390/met13061038), 2023-05-29
Supplement: s1 [file s1]

Archive with 1 entries (1 files):
- metals-2315638-supplementary.pdf
